# Supplementary material for: Critical Evaluation of Biocontrol Ability of Bayoud Infected Date Palm Phyllospheric Bacillus spp. Suggests That In Vitro Selection Does Not Guarantee Success in Planta
Source: MDPI journal article supplement (doi:10.3390/agronomy12102403), 2022-10-04
Supplement: s1 [file s1]

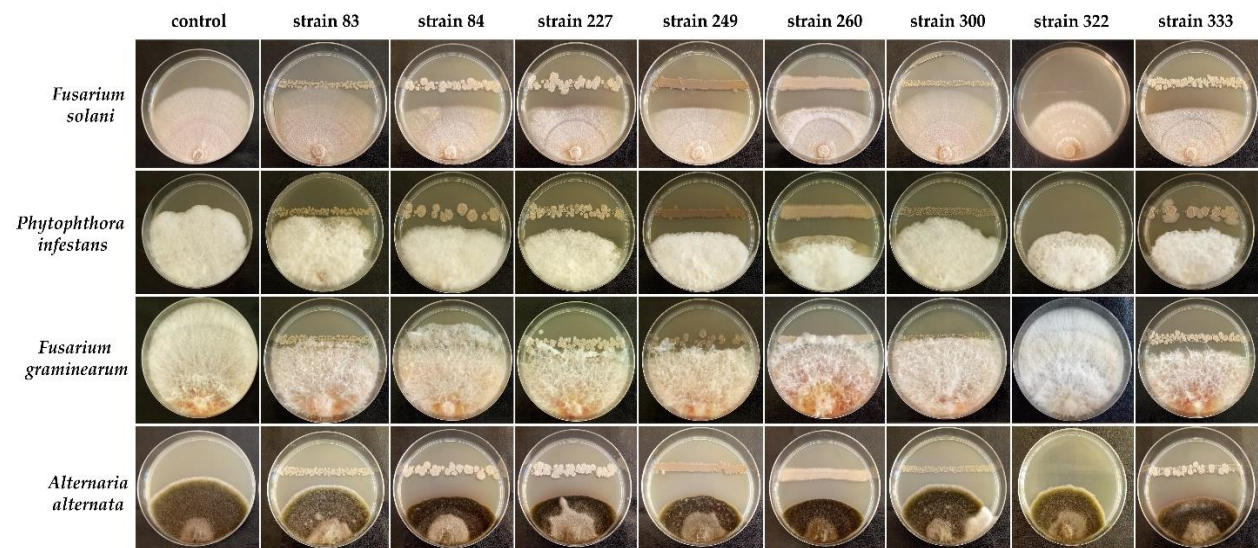

**Figure S1.** *In vitro* comparison test of the antifungal activity of bacterial strains against phytopathogenic fungi (*Fusarium solani*, *Phytophthora infestans*, *Fusarium graminearum*, and *Alternaria alternata*).

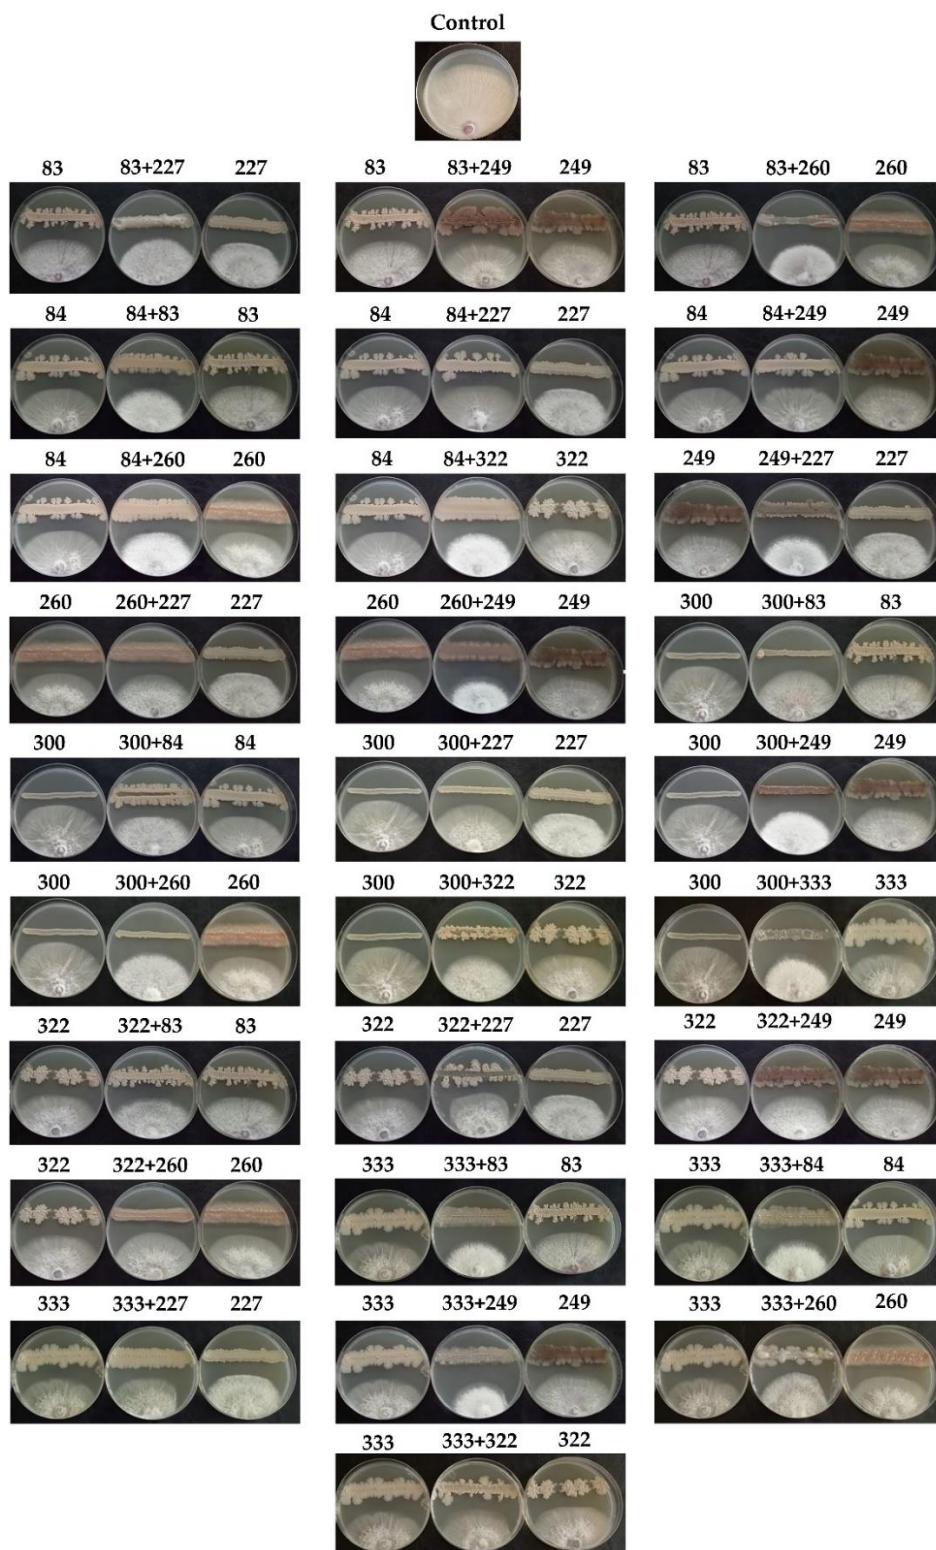

**Figure S2.** *In vitro* confrontation test of the antifungal activity of the combined bacterial strains against FOA1. A control Petri plate representative of FOA1 is shown above.

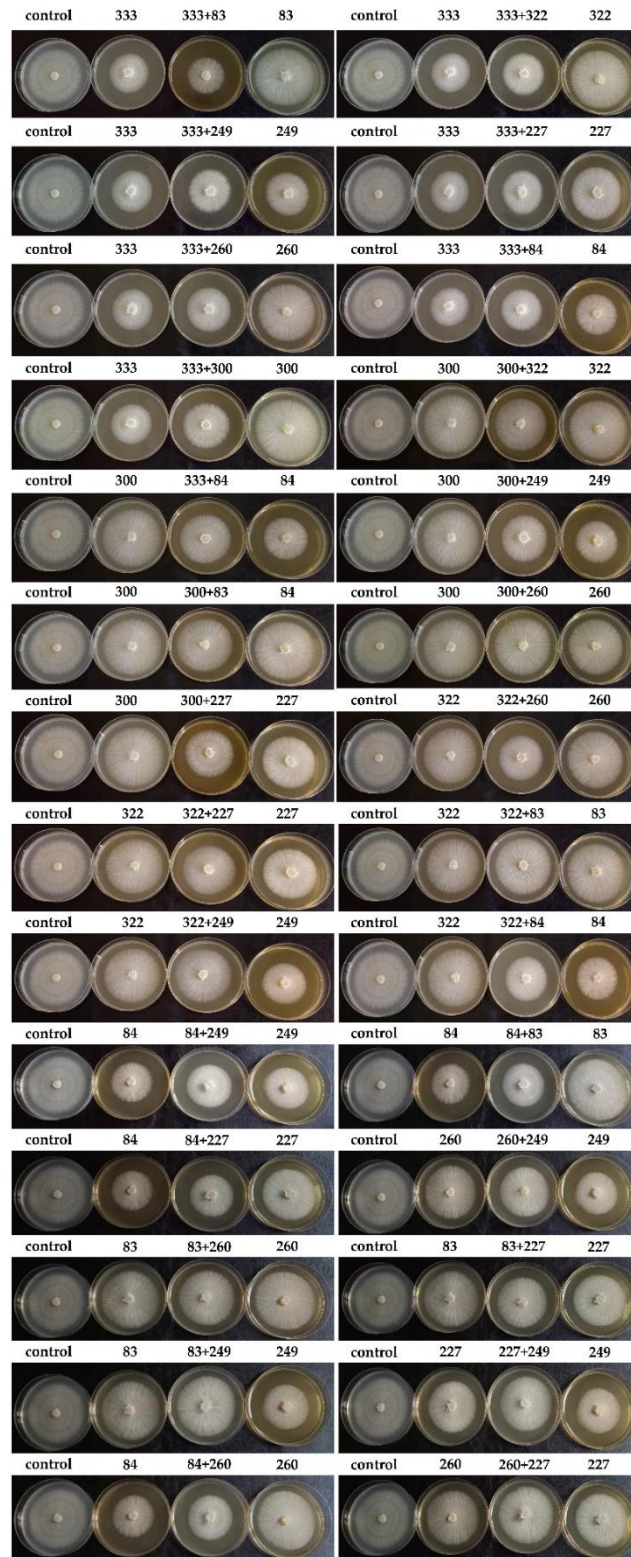

**Figure S3.** Inhibition of the growth of FOA 1 on PDA agar added to the cell-free culture supernatants of the bacterial strains, alone or combined.

Supplementary Table S1. Bacterial strains activity against *Fusarium albedinis* FOA.

| <b>H.Rh.S: Healthy Rhizospheric Soil</b>  |                               |
|-------------------------------------------|-------------------------------|
| Strains                                   | Mean $\pm$ Standard Deviation |
| 2                                         | 11.625 $\pm$ 0.81             |
| 10                                        | 11.735 $\pm$ 0.96             |
| 11                                        | 9.525 $\pm$ 1.85              |
| 21                                        | 12.5 $\pm$ 0.70               |
| 27                                        | 14.28 $\pm$ 0.00              |
| 29                                        | 13.705 $\pm$ 0.92             |
| 32                                        | 9.695 $\pm$ 0.67              |
| 37                                        | 12.85 $\pm$ 2.02              |
| 41                                        | 10.675 $\pm$ 0.78             |
| 53                                        | 12.78 $\pm$ 0.59              |
| 54                                        | 14.21 $\pm$ 1.31              |
| 56                                        | 13.045 $\pm$ 0.21             |
| 58                                        | 12.78 $\pm$ 0.50              |
| 59                                        | 14.6 $\pm$ 0.18               |
| 65                                        | 14.235 $\pm$ 1.67             |
| 67                                        | 14.945 $\pm$ 0.14             |
| 80                                        | 12.995 $\pm$ 0.60             |
| 83                                        | 25.775 $\pm$ 0.53             |
| 84                                        | 45.855 $\pm$ 0.37             |
| 175                                       | 38.155 $\pm$ 5.57             |
| 181                                       | 14.28 $\pm$ 0.00              |
| 182                                       | 14.28 $\pm$ 0.00              |
| 184                                       | 14.28 $\pm$ 0.00              |
| 194                                       | 14.28 $\pm$ 0.00              |
| 325                                       | 32.85 $\pm$ 2.02              |
| <b>I.Rh.S: Infected Rhizospheric Soil</b> |                               |
| Strains                                   | Mean $\pm$ Standard Deviation |
| 100                                       | 39.995 $\pm$ 4.03             |
| 101                                       | 44.28 $\pm$ 2.02              |
| 103                                       | 42.1 $\pm$ 3.71               |
| 104                                       | 29.015 $\pm$ 0.30             |
| 105                                       | 38.155 $\pm$ 1.85             |
| 106                                       | 45.71 $\pm$ 4.04              |
| 107                                       | 38.155 $\pm$ 1.85             |
| 109                                       | 48.57 $\pm$ 0.00              |
| 111                                       | 37.14 $\pm$ 4.04              |
| 112                                       | 48.57 $\pm$ 0.00              |
| 113                                       | 42.85 $\pm$ 0.00              |
| 117                                       | 41.425 $\pm$ 2.01             |
| 118                                       | 49.995 $\pm$ 3.72             |
| 124                                       | 32.89 $\pm$ 1.86              |
| 125                                       | 40 $\pm$ 0.00                 |

Supplementary Table S1. Continued.

| <b>I.Rh.S: Infected Rhizospheric Soil</b> |                               |
|-------------------------------------------|-------------------------------|
| Strains                                   | Mean $\pm$ Standard Deviation |



|                                     |                           |
|-------------------------------------|---------------------------|
| 130                                 | 19.735±1.85               |
| 132                                 | 12.85±2.02                |
| 290                                 | 35.71±2.02                |
| 197                                 | 15.015±0.30               |
| 199                                 | 17.015±0.30               |
| 201                                 | 10.745±0.88               |
| 206                                 | 18.14±0.60                |
| 207                                 | 16.14±0.60                |
| 300                                 | 22.62±0.70                |
| <b>S.NRh: Non-rhizospheric Soil</b> |                           |
| Strains                             | Mean ± Standard Deviation |
| 153                                 | 14.28±0.00                |
| 155                                 | 36.605±1.06               |
| 170                                 | 31.575±3.72               |
| 172                                 | 39.735±4.09               |
| 285                                 | 35.525±1.85               |
| 274                                 | 14.765±0.09               |
| 279                                 | 13.01±0.15                |
| 322                                 | 15.265±0.79               |
| 323                                 | 13.705±2.51               |
| 324                                 | 13.1±1.78                 |
| 333                                 | 45.1±0.42                 |
| <b>H.R: Healthy Root</b>            |                           |
| Strains                             | Mean ± Standard Deviation |
| 214                                 | 12.85±2.02                |
| 219                                 | 31.925±0.10               |
| 222                                 | 19.735±1.85               |
| 224                                 | 18.615±0.55               |
| 227                                 | 36.85±1.41                |
| 231                                 | 28.57±0.00                |
| 241                                 | 26.63±0.00                |
| 242                                 | 19.735±1.85               |
| 245                                 | 6.445±4.56                |
| <b>I.R: Infected Roots</b>          |                           |
| Strains                             | Mean ± Standard Deviation |
| 247                                 | 16.125±4.56               |
| 249                                 | 41.39±26.41               |
| 254                                 | 14.51±2.27                |
| 260                                 | 25.71±2.02                |
| 261                                 | 26.31±7.43                |
| 266                                 | 14.28±0.00                |
